# Supplementary material for: Kinetics of the iodate reduction by hydrogen peroxide and relation with the Briggs–Rauscher and Bray–Liebhafsky oscillating reactions
Source: Royal Society of Chemistry journal article supplement (doi:10.1039/c2cp23805e), 2012-01-01
Supplement: c2cp23805e.pdf [file c2cp23805e.pdf]

## Kinetics of the iodate reduction by hydrogen peroxide and relation with the Briggs-Rauscher and Bray-Liebafsky oscillating reactions

Guy Schmitz and Stanley Furrow

### Electronic supplementary information

**1. Table ES1.** Initial rates ( $\text{M s}^{-1}$ ) of the iodate reduction by hydrogen peroxide at low concentrations

| $[\text{HClO}_4]_0$ | $[\text{KIO}_3]_0$ | $[\text{H}_2\text{O}_2]_0$ | $[\text{H}^+]$ | $[\text{IO}_3^-]$ | $d[\text{I}_2]/dt \times 10^8$ |
|---------------------|--------------------|----------------------------|----------------|-------------------|--------------------------------|
| <b>25°</b>          |                    |                            |                |                   |                                |
| 0.0385              | 0.0962             | 0.385                      | 0.029          | 0.087             | 1.12                           |
| 0.0385              | 0.0962             | 0.385                      | 0.029          | 0.087             | 0.89                           |
| 0.040               | 0.099              | 0.099                      | 0.030          | 0.089             | 0.24                           |
| 0.040               | 0.100              | 0.050                      | 0.030          | 0.090             | 0.13                           |
| 0.078               | 0.098              | 0.220                      | 0.061          | 0.080             | 0.87                           |
| 0.098               | 0.098              | 0.196                      | 0.077          | 0.077             | 1.00                           |
| <b>39°</b>          |                    |                            |                |                   |                                |
| 0.0096              | 0.019              | 0.385                      | 0.009          | 0.019             | 0.62                           |
| 0.0096              | 0.096              | 0.385                      | 0.007          | 0.093             | 2.1                            |
| 0.0098              | 0.020              | 0.196                      | 0.009          | 0.019             | 0.31                           |
| 0.0098              | 0.098              | 0.039                      | 0.007          | 0.095             | 0.29                           |
| 0.0098              | 0.098              | 0.196                      | 0.007          | 0.095             | 1.1                            |
| 0.0099              | 0.099              | 0.099                      | 0.007          | 0.096             | 0.66                           |
| 0.038               | 0.019              | 0.385                      | 0.036          | 0.017             | 1.0                            |
| 0.038               | 0.096              | 0.385                      | 0.028          | 0.086             | 3.7                            |
| 0.039               | 0.020              | 0.039                      | 0.037          | 0.017             | 0.093                          |
| 0.039               | 0.020              | 0.196                      | 0.037          | 0.017             | 0.49                           |
| 0.039               | 0.098              | 0.039                      | 0.029          | 0.088             | 0.47                           |
| 0.039               | 0.098              | 0.196                      | 0.029          | 0.088             | 1.8                            |
| 0.040               | 0.020              | 0.099                      | 0.037          | 0.017             | 0.26                           |
| 0.040               | 0.099              | 0.099                      | 0.029          | 0.088             | 0.96                           |

|       |       |       |       |       |      |
|-------|-------|-------|-------|-------|------|
| 0.083 | 0.083 | 0.167 | 0.066 | 0.066 | 2.7  |
| 0.091 | 0.091 | 0.091 | 0.070 | 0.070 | 1.54 |
| 0.098 | 0.049 | 0.196 | 0.085 | 0.036 | 2.1  |
| 0.099 | 0.099 | 0.099 | 0.075 | 0.075 | 2.2  |
| 0.190 | 0.048 | 0.476 | 0.171 | 0.028 | 7.5  |
| 0.192 | 0.096 | 0.385 | 0.155 | 0.059 | 12.4 |
| 0.196 | 0.049 | 0.196 | 0.175 | 0.028 | 3.3  |
| 0.196 | 0.098 | 0.196 | 0.157 | 0.059 | 6.1  |
| 0.196 | 0.098 | 0.196 | 0.157 | 0.059 | 6.2  |
| 0.198 | 0.099 | 0.099 | 0.159 | 0.060 | 3.0  |

---

**60°**

| $[\text{HClO}_4]_0$ | $[\text{NaIO}_3]_0$ | $[\text{H}_2\text{O}_2]_0$ | $[\text{H}^+]$ | $[\text{IO}_3^-]$ | $d[\text{I}_2]/dt \times 10^8$ |
|---------------------|---------------------|----------------------------|----------------|-------------------|--------------------------------|
| 0.038               | 0.101               | 0.051                      | 0.026          | 0.090             | 6.8                            |
| 0.038               | 0.097               | 0.052                      | 0.027          | 0.086             | 7.2                            |
| 0.044               | 0.050               | 0.091                      | 0.036          | 0.043             | 7.4                            |
| 0.044               | 0.100               | 0.041                      | 0.031          | 0.087             | 5.9                            |
| 0.047               | 0.118               | 0.029                      | 0.031          | 0.102             | 5.1                            |
| 0.050               | 0.063               | 0.024                      | 0.040          | 0.052             | 2.4                            |
| 0.050               | 0.189               | 0.026                      | 0.028          | 0.167             | 6.9                            |
| 0.052               | 0.050               | 0.050                      | 0.043          | 0.041             | 4.2                            |
| 0.057               | 0.057               | 0.043                      | 0.047          | 0.047             | 4.5                            |
| 0.062               | 0.047               | 0.053                      | 0.053          | 0.038             | 4.8                            |
| 0.062               | 0.049               | 0.090                      | 0.052          | 0.039             | 8.1                            |
| 0.062               | 0.099               | 0.095                      | 0.044          | 0.082             | 17.0                           |
| 0.062               | 0.189               | 0.053                      | 0.035          | 0.162             | 15.4                           |
| 0.062               | 0.200               | 0.091                      | 0.034          | 0.171             | 30                             |
| 0.063               | 0.100               | 0.023                      | 0.045          | 0.082             | 3.8                            |
| 0.063               | 0.095               | 0.026                      | 0.045          | 0.078             | 4.2                            |
| 0.063               | 0.100               | 0.048                      | 0.045          | 0.082             | 7.9                            |
| 0.063               | 0.100               | 0.058                      | 0.045          | 0.082             | 10.1                           |
| 0.074               | 0.198               | 0.042                      | 0.041          | 0.165             | 12.7                           |
| 0.074               | 0.200               | 0.050                      | 0.041          | 0.167             | 15.9                           |

|       |       |       |       |       |      |
|-------|-------|-------|-------|-------|------|
| 0.075 | 0.047 | 0.026 | 0.064 | 0.036 | 2.6  |
| 0.075 | 0.047 | 0.053 | 0.064 | 0.036 | 5.4  |
| 0.075 | 0.095 | 0.027 | 0.055 | 0.075 | 4.9  |
| 0.075 | 0.095 | 0.053 | 0.055 | 0.075 | 9.5  |
| 0.075 | 0.189 | 0.053 | 0.042 | 0.157 | 17.5 |
| 0.075 | 0.200 | 0.054 | 0.041 | 0.166 | 17.5 |
| 0.087 | 0.200 | 0.050 | 0.049 | 0.162 | 17.0 |
| 0.094 | 0.100 | 0.056 | 0.069 | 0.075 | 11.7 |

## 2. Comparison with the rate law $r_{\text{ini}} = (k'_R + k''_R [\text{HClO}_4]_o) [\text{KIO}_3]_o [\text{H}_2\text{O}_2]_o$

Figures ES1 and ES2 show that the values of  $r_{\text{ini}} / [\text{KIO}_3]_o [\text{H}_2\text{O}_2]_o$  depend on the  $[\text{KIO}_3]_o$  values. Thus, the rate law  $r_{\text{ini}} = (k'_R + k''_R [\text{HClO}_4]_o) [\text{KIO}_3]_o [\text{H}_2\text{O}_2]_o$  is not verified. On the contrary, the values of  $r_{\text{ini}} / [\text{IO}_3^-] [\text{H}_2\text{O}_2]_o$  do not depend on  $[\text{IO}_3^-]$ .

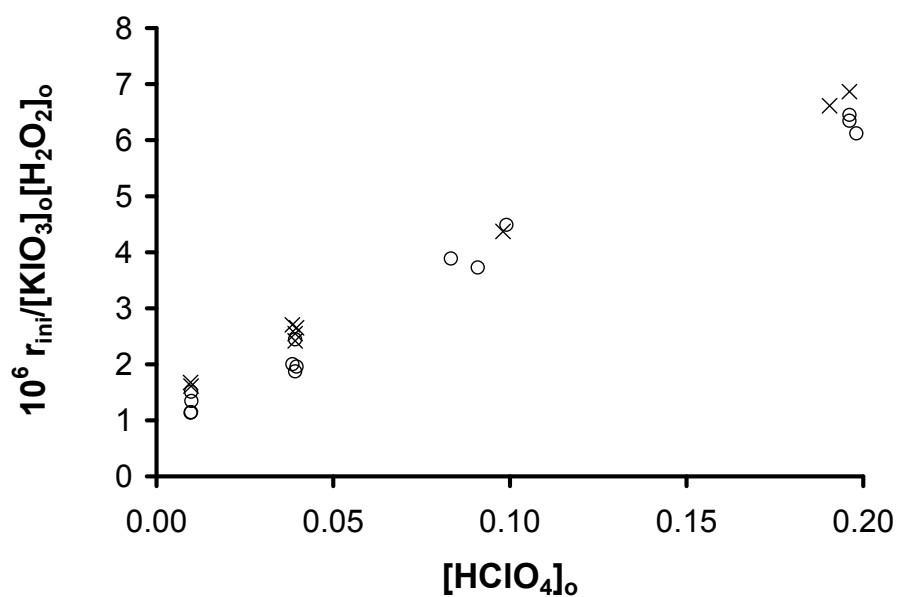

**Fig.ES1.** The values of  $r_{\text{ini}} / [\text{KIO}_3]_o [\text{H}_2\text{O}_2]_o$  at 39° are higher when  $[\text{KIO}_3]_o < 0.05$  M (×) than when  $[\text{KIO}_3]_o > 0.08$  M (O).

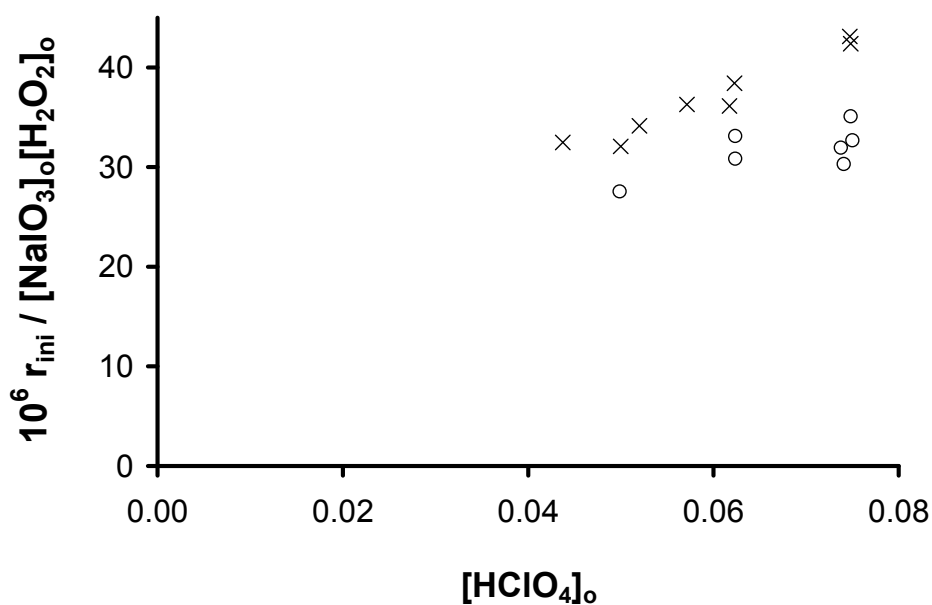

**Fig.ES2.** The values of  $r_{\text{ini}} / [\text{NaIO}_3]_o [\text{H}_2\text{O}_2]_o$  at  $60^\circ$  are higher when  $[\text{NaIO}_3]_o \sim 0.05 \text{ M}$  (x) than when  $[\text{NaIO}_3]_o \sim 0.19 \text{ M}$  (O).

### 3. Initial rates of the iodate reduction by hydrogen peroxide at high concentrations

There is no simple rate law valid in the whole domain of concentrations. However, to see more clearly the effect of the concentrations on the radical pathway, we have looked for an empirical correlation between the rates and the concentrations. Table ES2 compares the experimental rates for  $[\text{HClO}_4]_o = 0.10 \text{ M}$  and the values calculated by the following equation.  $r_1$  is given by equation (1) in the main text and the best fit was obtained using  $x = 2.35$ ,  $k = 2.2 \times 10^{-4}$  and  $K = 641$ .

$$r_{\text{exp}} = r_1 + k \frac{[\text{H}_2\text{O}_2]^x [\text{IO}_3^-]}{1 + K[\text{IO}_3^-]}$$

**Table ES2.** Experimental and calculated initial rates ( $\text{M s}^{-1}$ ) of the iodate reduction by hydrogen peroxide.  $[\text{HClO}_4]_0 = 0.10 \text{ M}$ .

| $[\text{KIO}_3]_0$         | $[\text{H}_2\text{O}_2]_0$ | $[\text{H}^+]$ | $[\text{IO}_3^-]$ | $r_{\text{exp}} \times 10^6$ | $r_{\text{calc}} \times 10^6$ | $r_{\text{calc}}/r_{\text{exp}}$ |
|----------------------------|----------------------------|----------------|-------------------|------------------------------|-------------------------------|----------------------------------|
| 0.001                      | 1.0                        | 0.0997         | 0.00074           | 0.099                        | 0.112                         | 1.10                             |
| 0.001                      | 1.0                        | 0.0997         | 0.00074           | 0.115                        | 0.112                         | 0.97                             |
| 0.002                      | 1.0                        | 0.0995         | 0.00147           | 0.20                         | 0.17                          | 0.87                             |
| 0.005                      | 1.0                        | 0.0987         | 0.00369           | 0.23                         | 0.25                          | 1.07                             |
| 0.005                      | 1.0                        | 0.0987         | 0.00369           | 0.26                         | 0.25                          | 0.94                             |
| 0.01                       | 1.0                        | 0.0974         | 0.00740           | 0.26                         | 0.30                          | 1.16                             |
| 0.01                       | 1.0                        | 0.0974         | 0.00740           | 0.30                         | 0.30                          | 1.00                             |
| 0.01                       | 1.0                        | 0.0974         | 0.00740           | 0.27                         | 0.30                          | 1.10                             |
| 0.002                      | 1.5                        | 0.0995         | 0.00147           | 0.48                         | 0.44                          | 0.91                             |
| 0.0033                     | 1.5                        | 0.0991         | 0.00243           | 0.57                         | 0.55                          | 0.96                             |
| 0.005                      | 1.5                        | 0.0987         | 0.00369           | 0.64                         | 0.64                          | 0.99                             |
| 0.01                       | 1.5                        | 0.0974         | 0.00740           | 0.67                         | 0.76                          | 1.13                             |
| 0.001                      | 1.99                       | 0.0997         | 0.00074           | 0.48                         | 0.56                          | 1.16                             |
| 0.005                      | 1.99                       | 0.0987         | 0.00369           | 1.56                         | 1.23                          | 0.79                             |
| 0.002                      | 2.0                        | 0.0995         | 0.00147           | 1.15                         | 0.86                          | 0.75                             |
| 0.01                       | 2.0                        | 0.0974         | 0.00740           | 1.23                         | 1.48                          | 1.19                             |
| 0.01                       | 2.0                        | 0.0974         | 0.00740           | 1.37                         | 1.48                          | 1.08                             |
| 0.001                      | 3.0                        | 0.0997         | 0.00074           | 1.48                         | 1.47                          | 0.99                             |
| 0.002                      | 3.0                        | 0.0995         | 0.00147           | 2.44                         | 2.23                          | 0.91                             |
| 0.005                      | 3.0                        | 0.0987         | 0.00369           | 3.75                         | 3.20                          | 0.86                             |
| 0.01                       | 3.0                        | 0.0974         | 0.00740           | 4.08                         | 3.81                          | 0.93                             |
| <b>Intermediate region</b> |                            |                |                   |                              |                               |                                  |
| 0.10                       | 0.40                       | 0.078          | 0.0780            | 0.094                        | 0.079                         | 0.84                             |
| 0.10                       | 0.35                       | 0.078          | 0.0780            | 0.062                        | 0.064                         | 1.03                             |
| 0.01                       | 0.35                       | 0.097          | 0.0074            | 0.026                        | 0.028                         | 1.09                             |
| 0.10                       | 0.30                       | 0.078          | 0.0780            | 0.051                        | 0.050                         | 0.98                             |
| 0.01                       | 0.30                       | 0.097          | 0.0074            | 0.020                        | 0.020                         | 1.01                             |
